# Supplementary material for: Pan-Cancer Analyses Reveal Long Intergenic Non-Coding RNAs Relevant to Tumor Diagnosis, Subtyping and Prognosis
Source: PubMed Central journal article supplement — eBioMedicine. 2016 Mar 19;7:62–72. doi: 10.1016/j.ebiom.2016.03.023 (PMC4909364; doi:10.1016/j.ebiom.2016.03.023), 2016-03-19
Supplement: mmc1.pdf [file mmc1.pdf]

Supplementary Figure 1

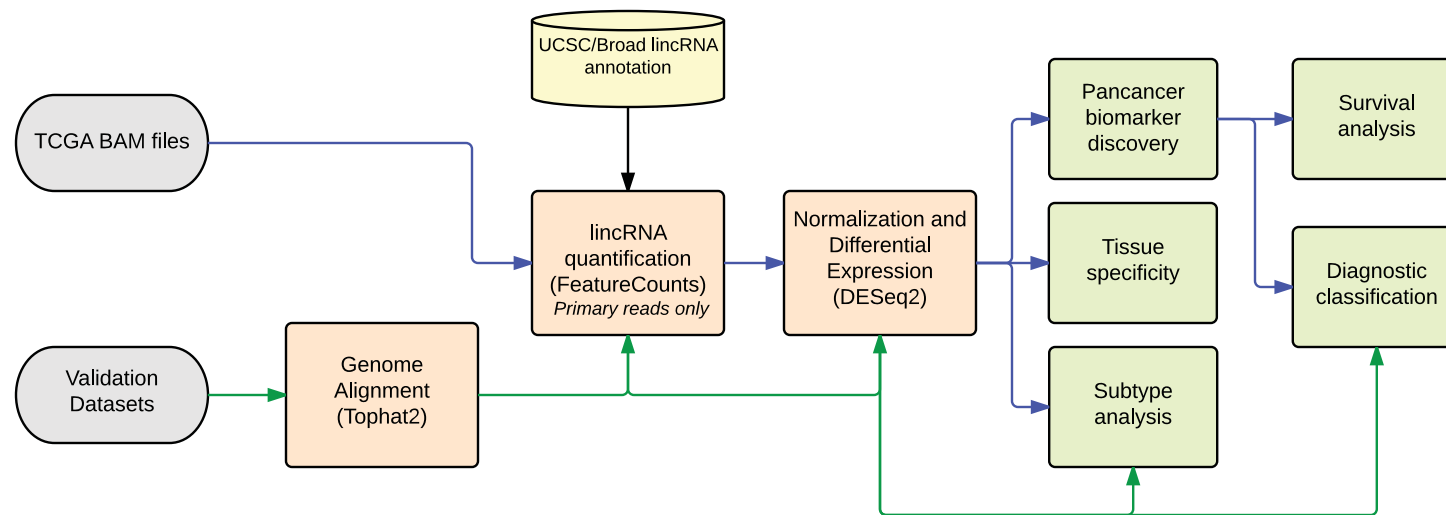

Refseq genes adjacent normal sample PCA

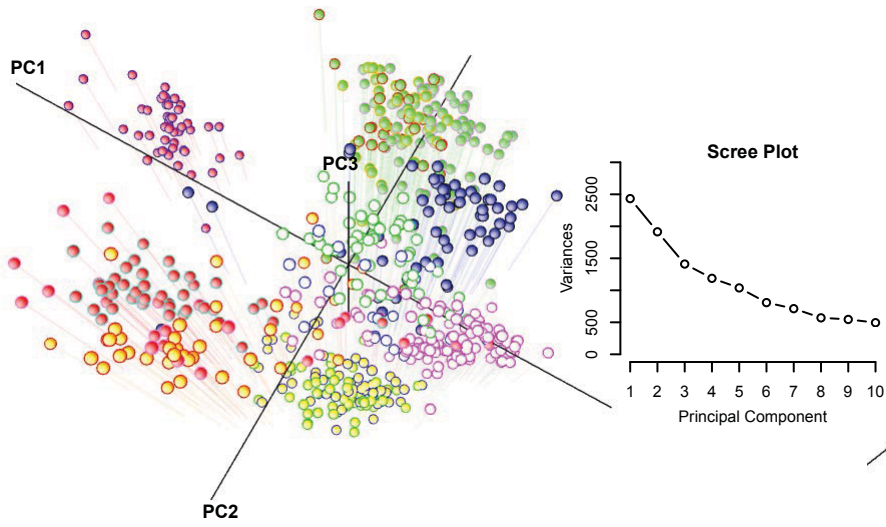

Refseq genes cancer sample PCA

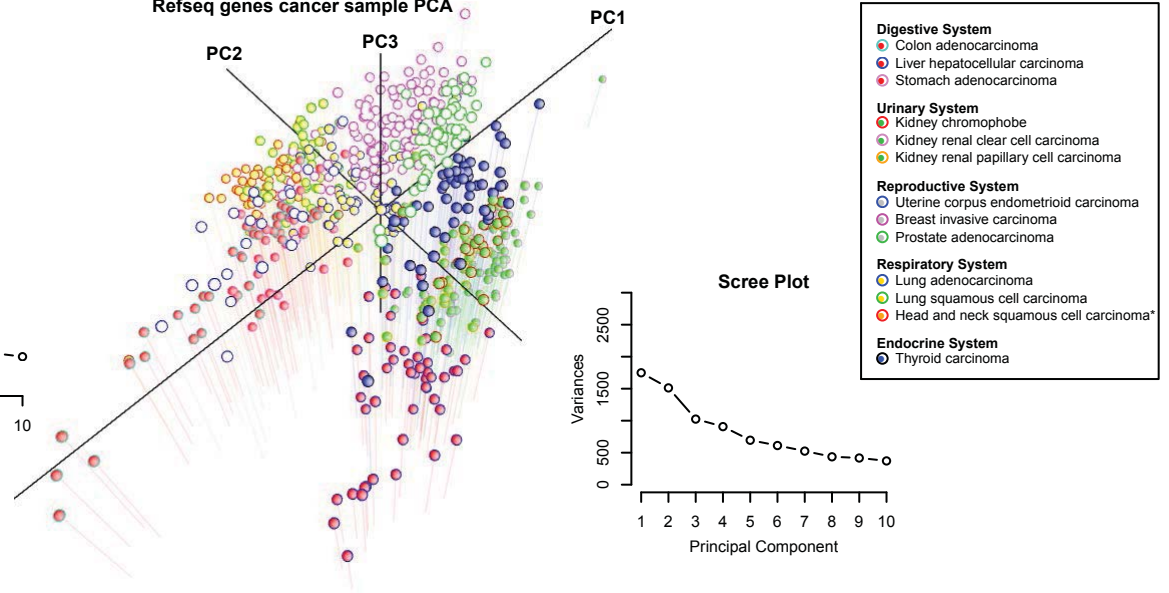

- Digestive System**
  - Colon adenocarcinoma
  - Liver hepatocellular carcinoma
  - Stomach adenocarcinoma
- Urinary System**
  - Kidney chromophobe
  - Kidney renal clear cell carcinoma
  - Kidney renal papillary cell carcinoma
- Reproductive System**
  - Uterine corpus endometrioid carcinoma
  - Breast invasive carcinoma
  - Prostate adenocarcinoma
- Respiratory System**
  - Lung adenocarcinoma
  - Lung squamous cell carcinoma
  - Head and neck squamous cell carcinoma\*
- Endocrine System**
  - Thyroid carcinoma

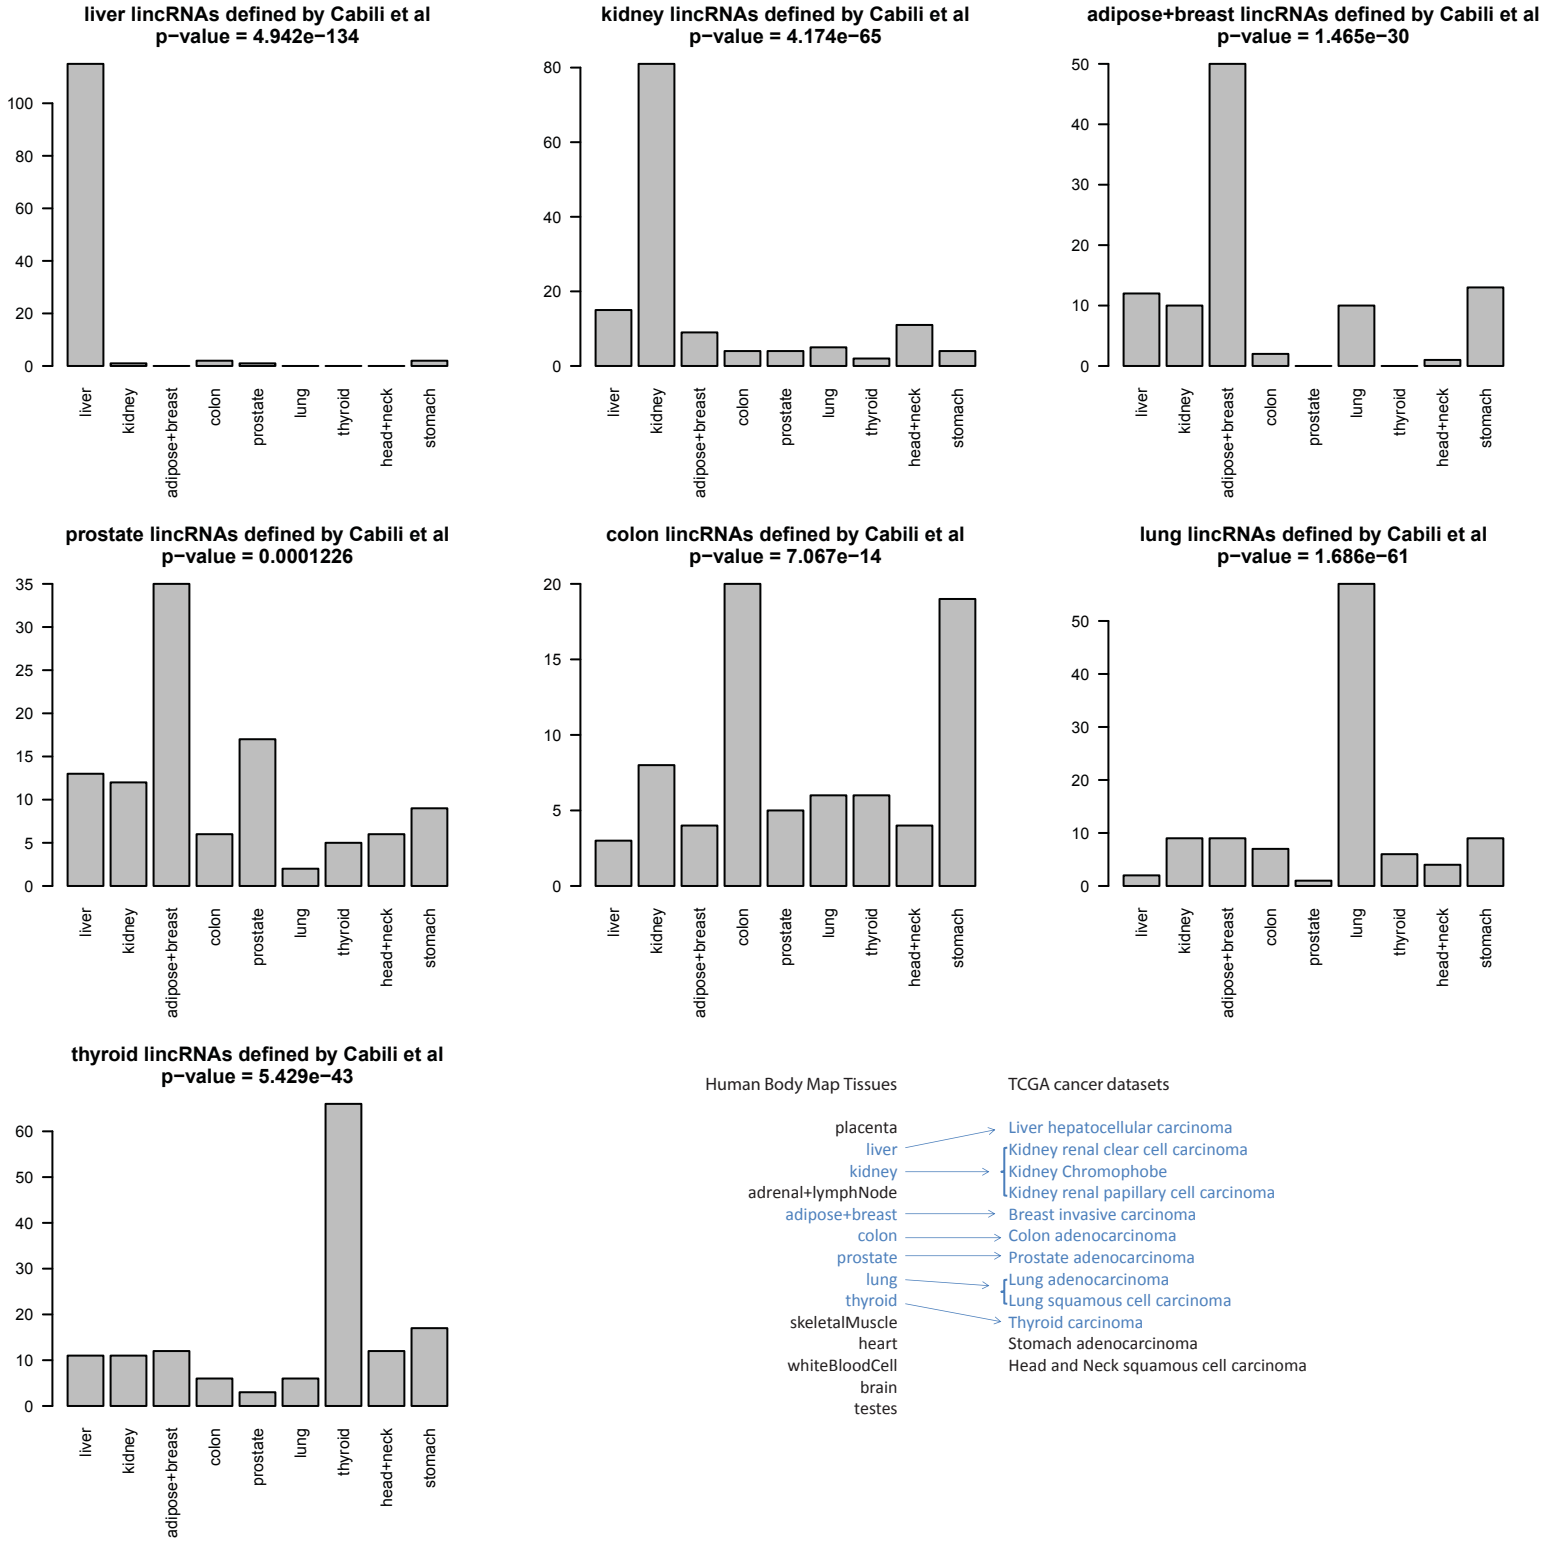

## JS scores by tissue

cancer normal

Tissue specificity for liver

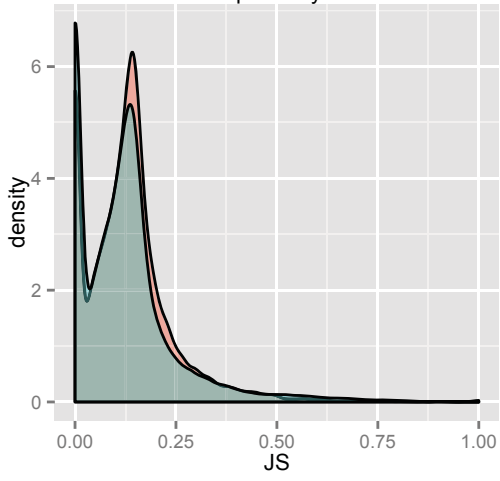

Tissue specificity for kidney

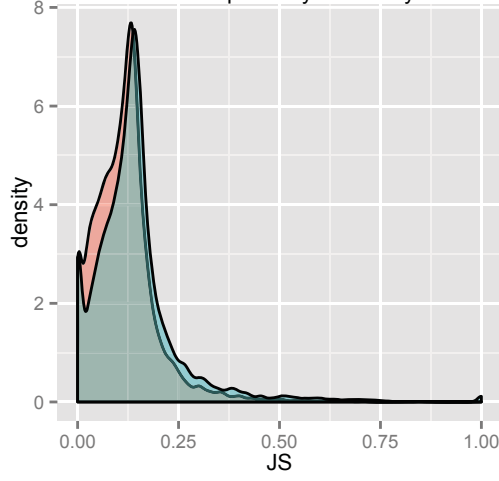

Tissue specificity for adipose+breast

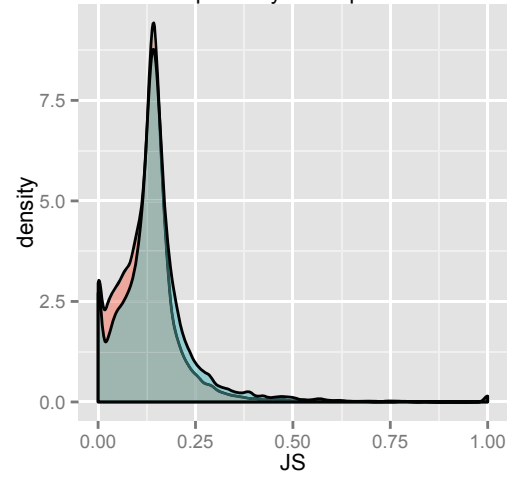

Tissue specificity for colon

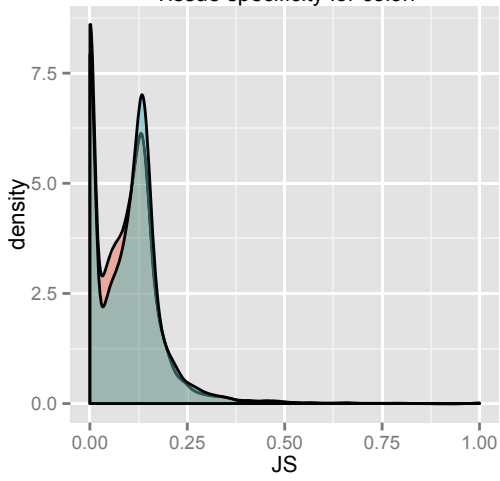

Tissue specificity for prostate

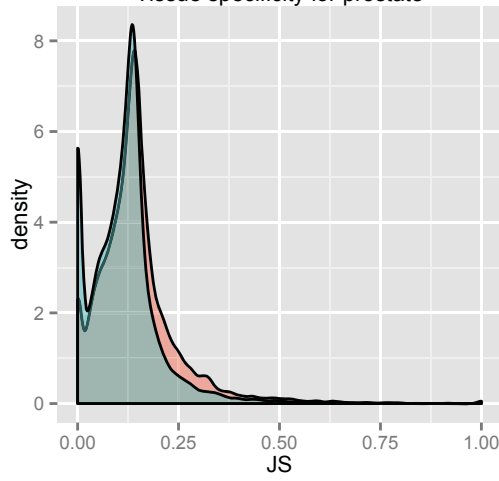

Tissue specificity for lung

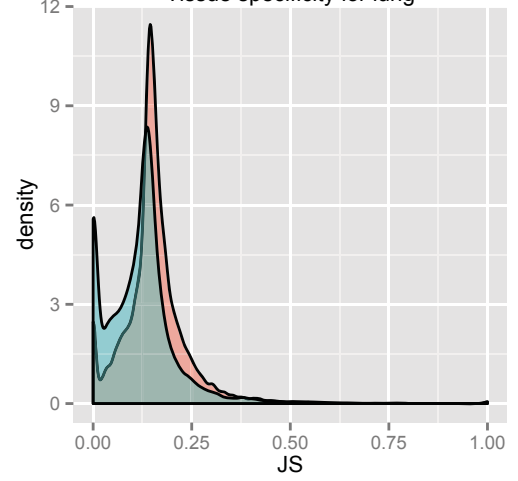

Tissue specificity for thyroid

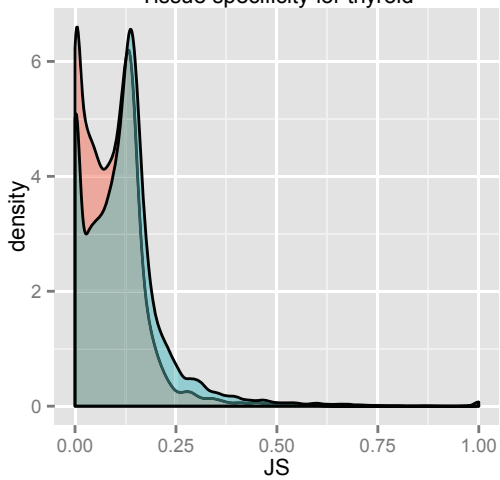

Tissue specificity for head+neck

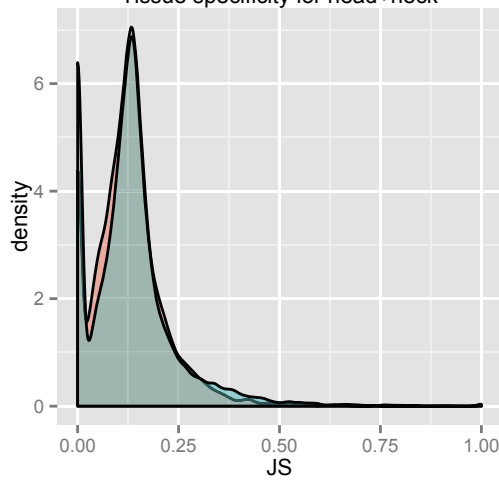

Tissue specificity for stomach

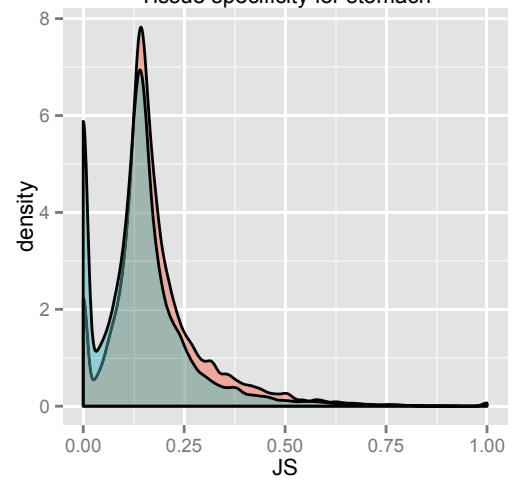

Supplementary Figure 5

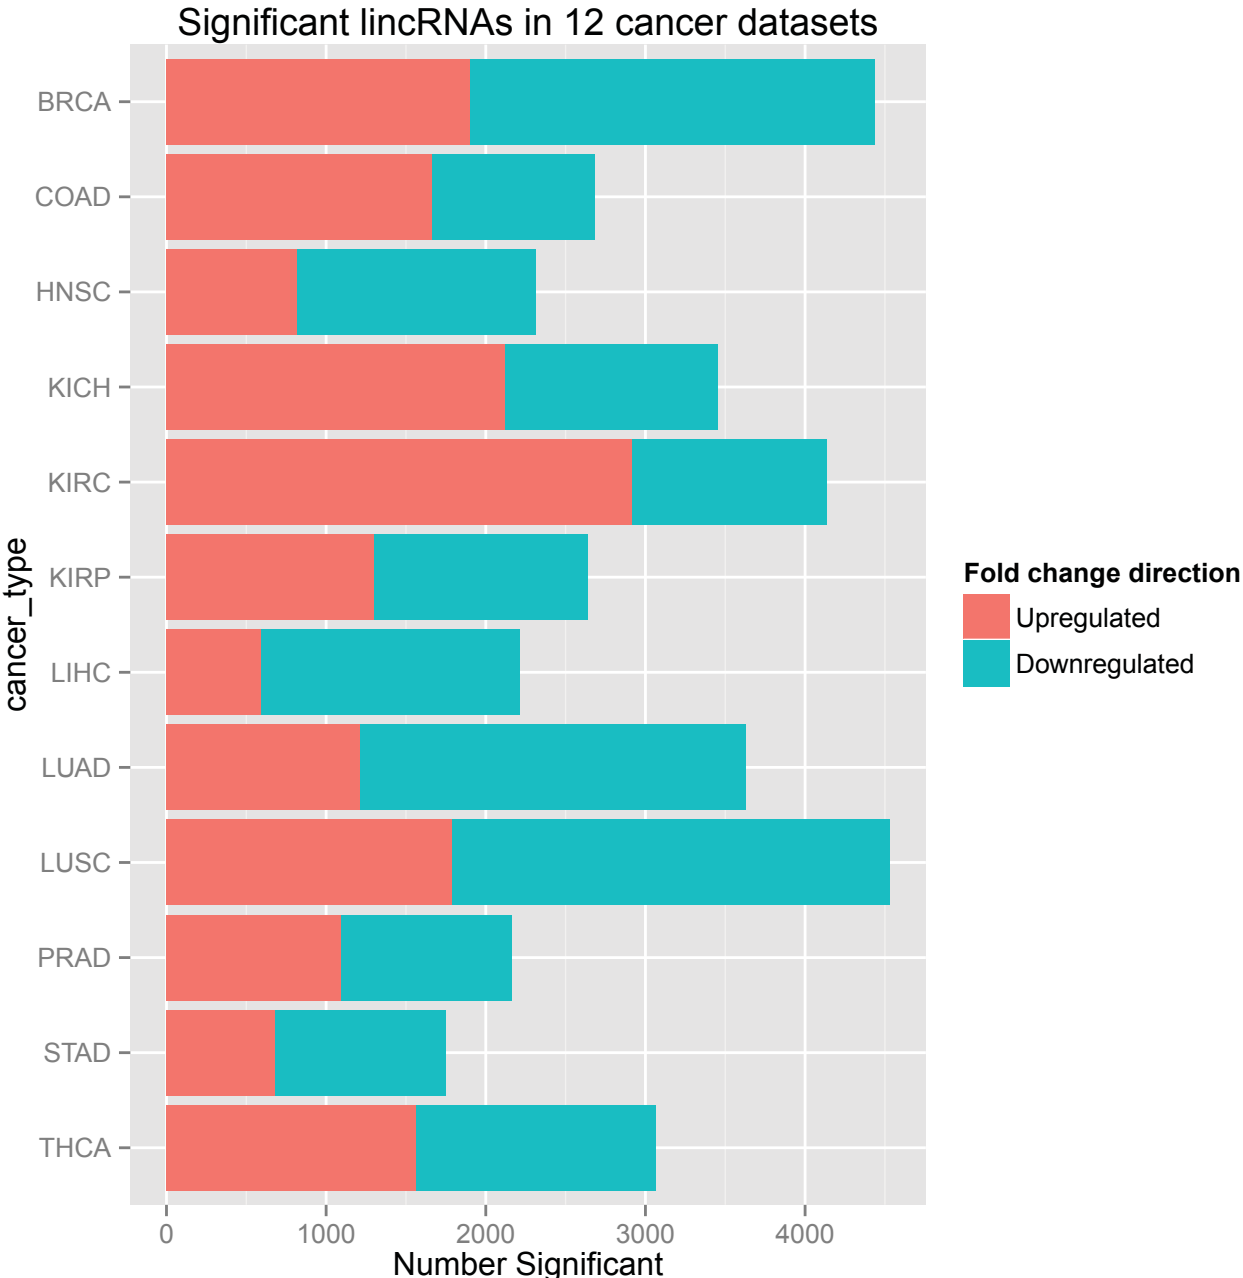

Supplementary Figure 6

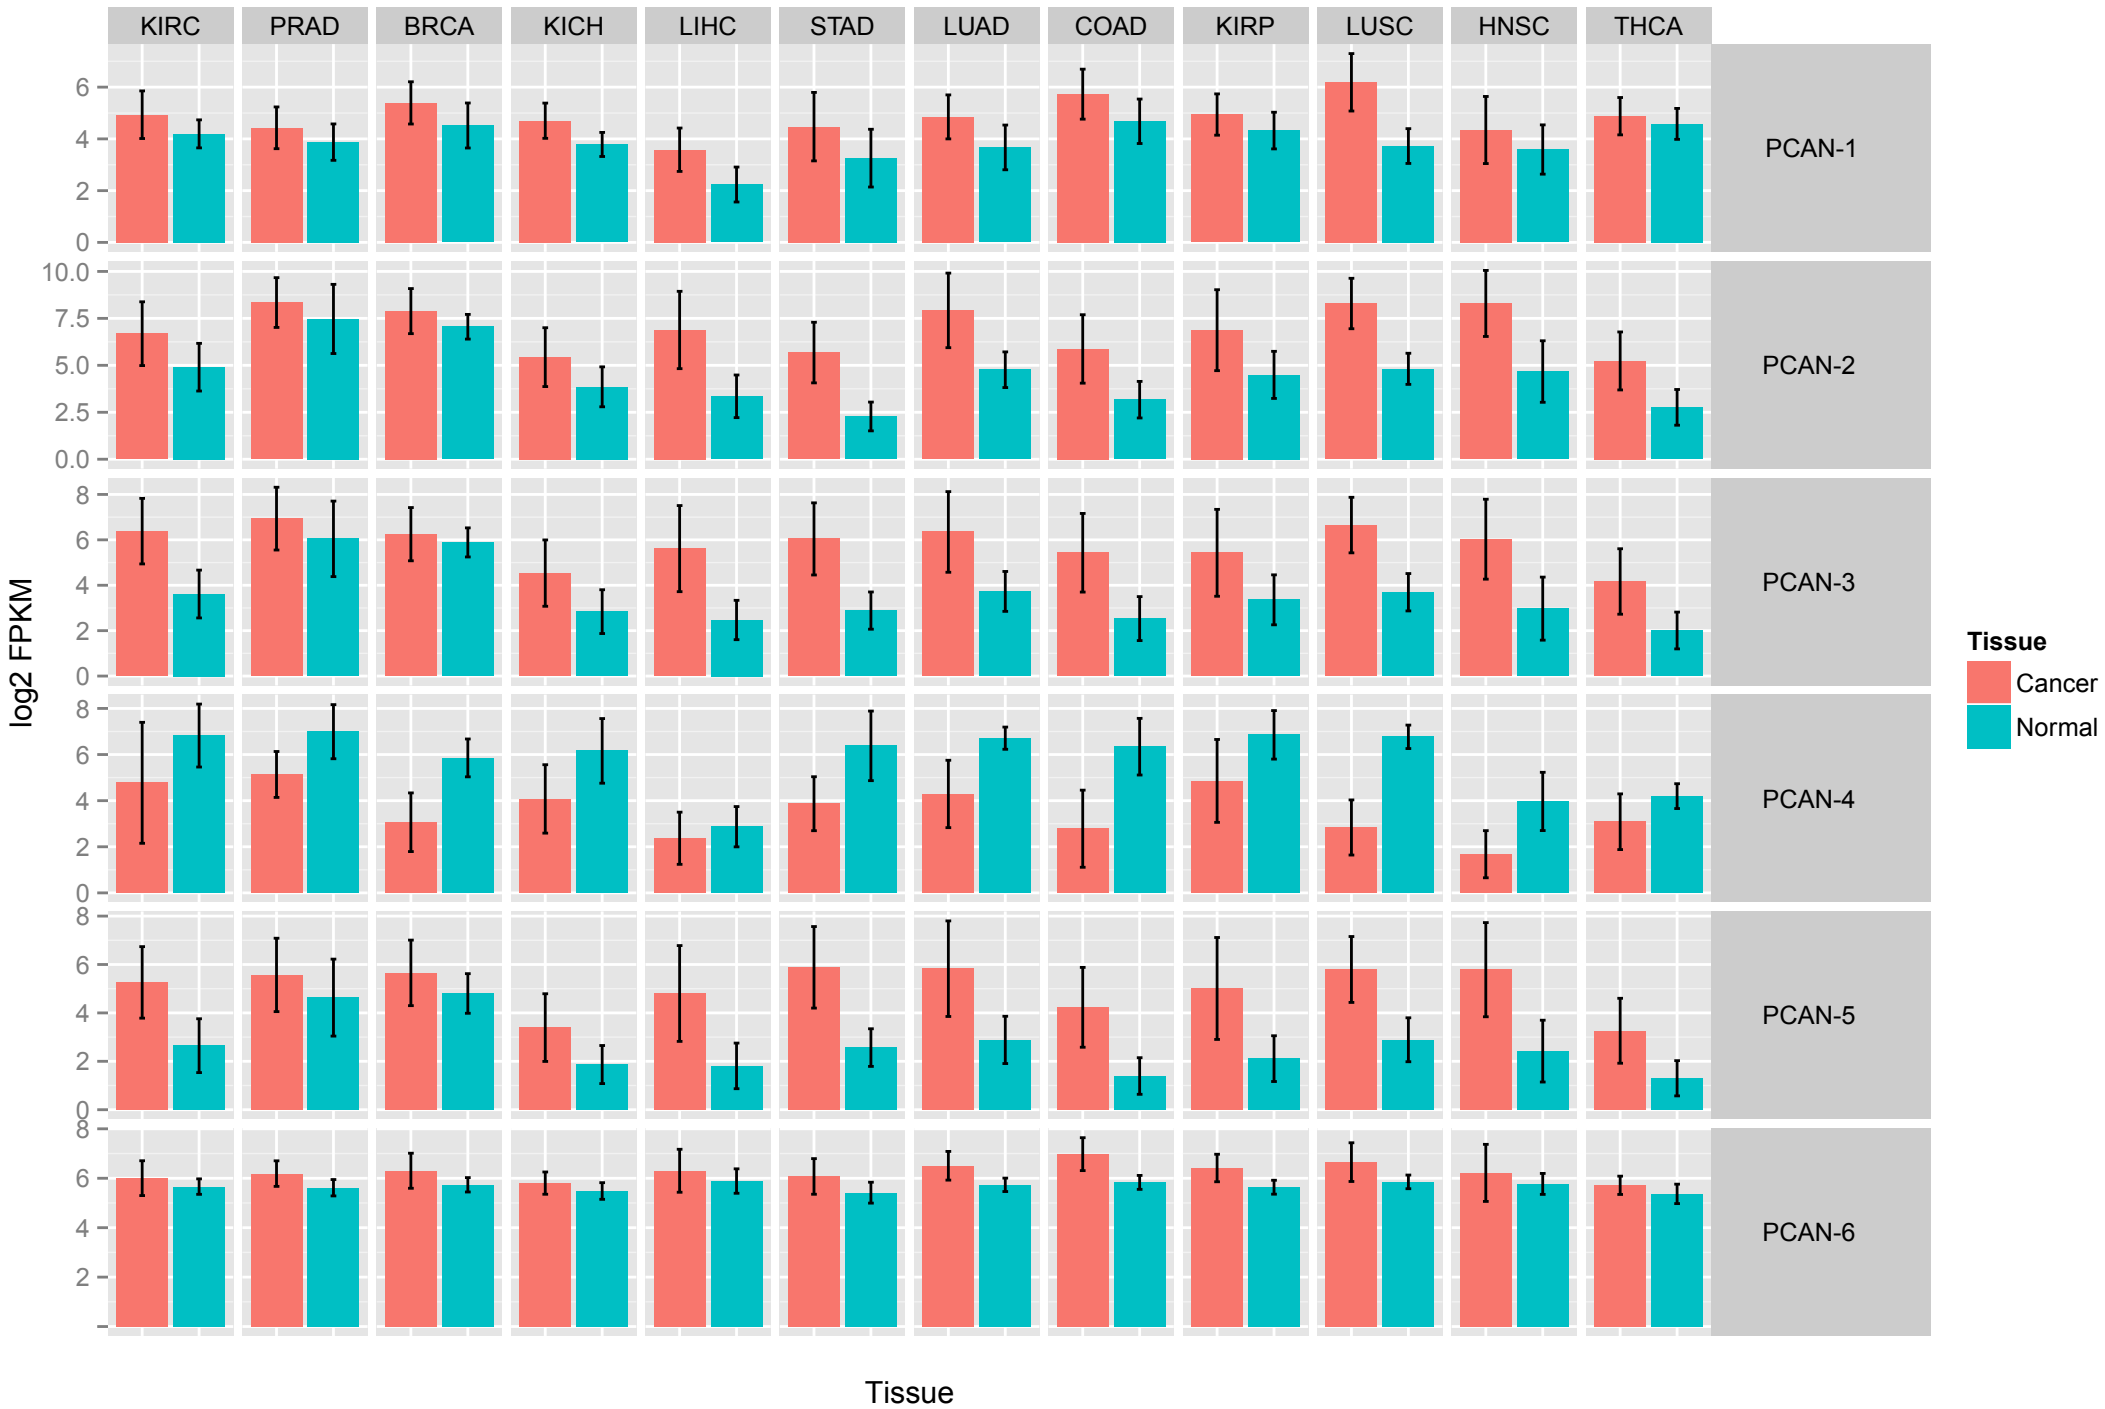

Supplementary Figure 7

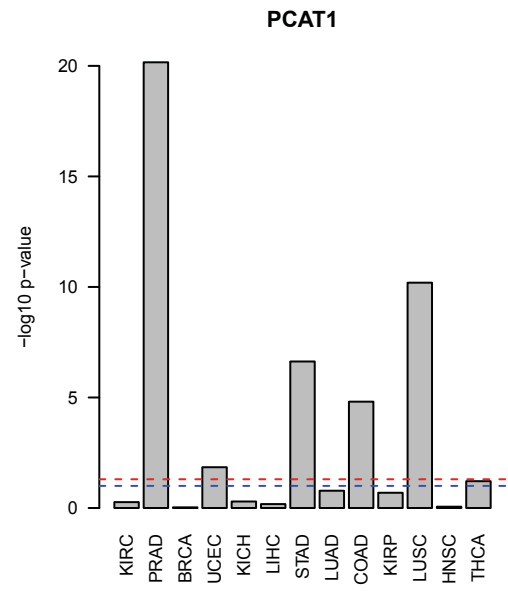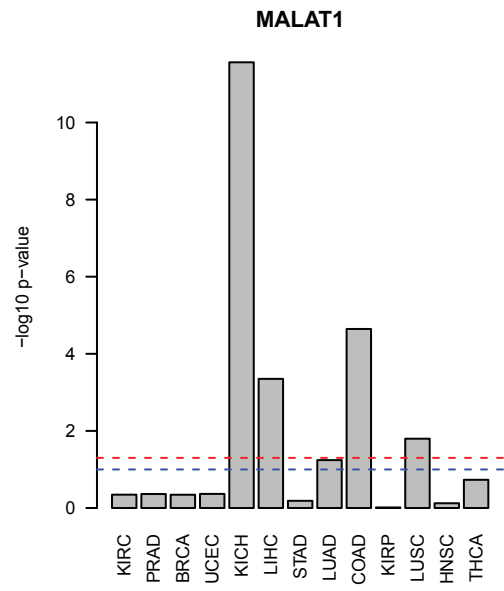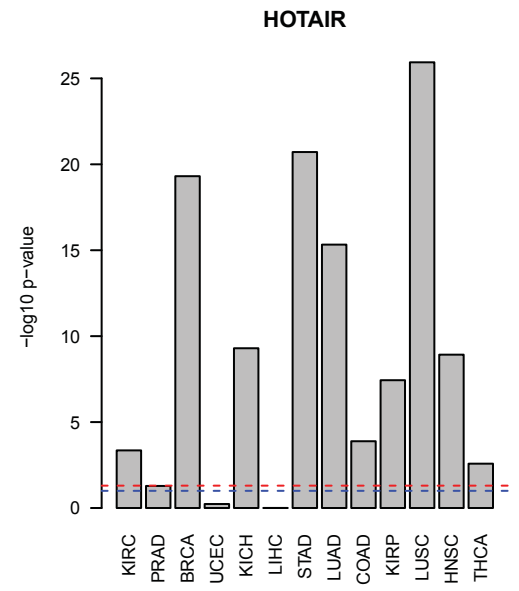

## Microarray Validation

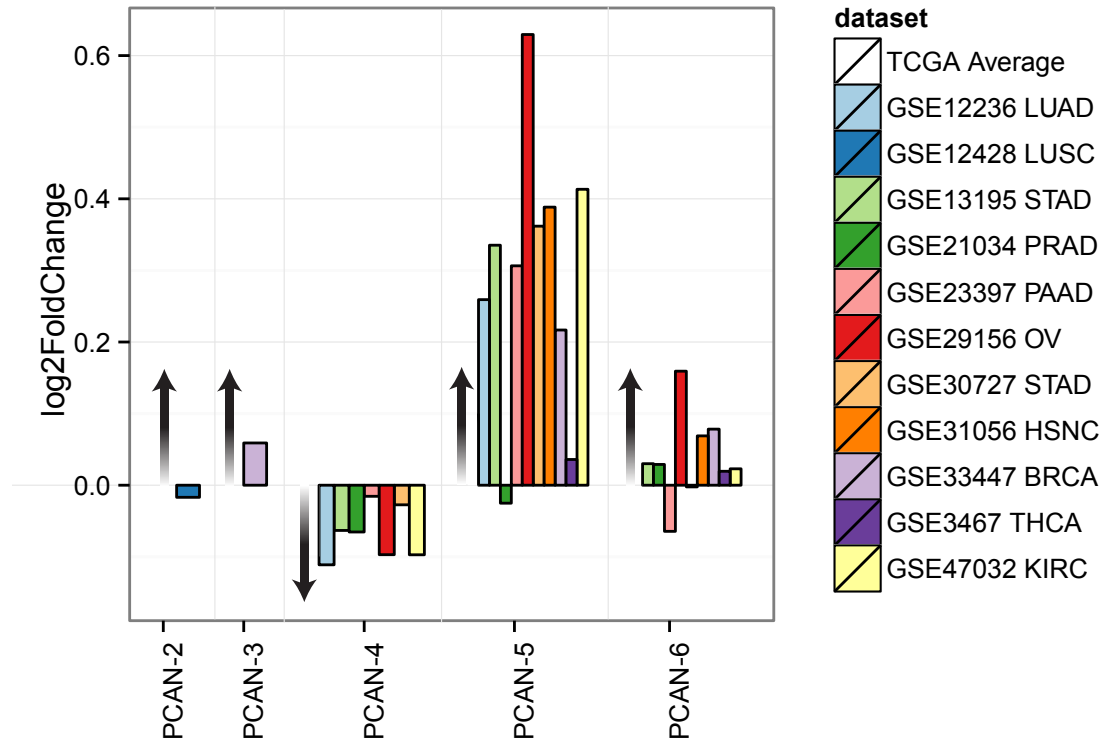



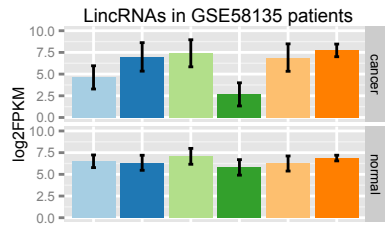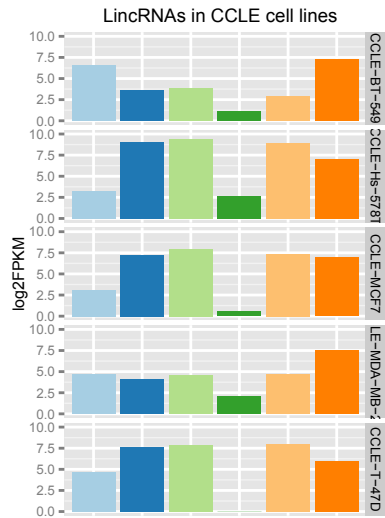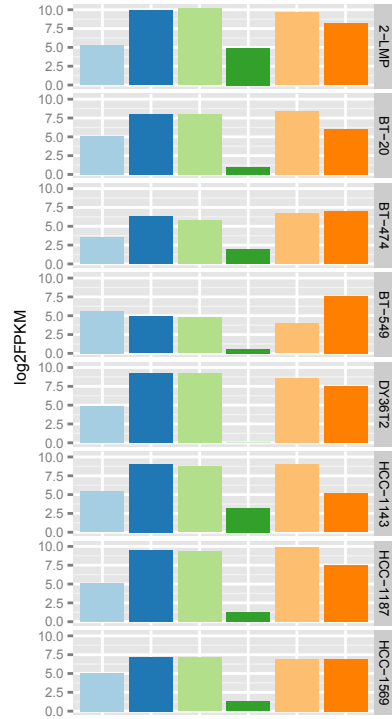

### LincRNAs in GSE58135 cell lines

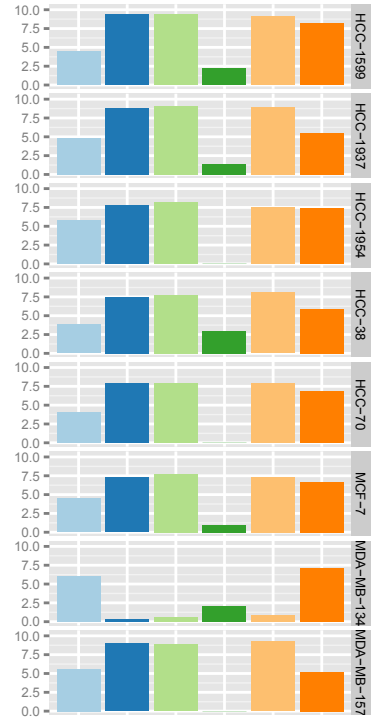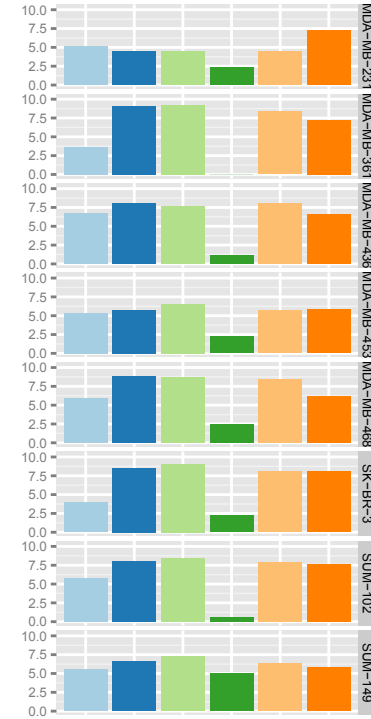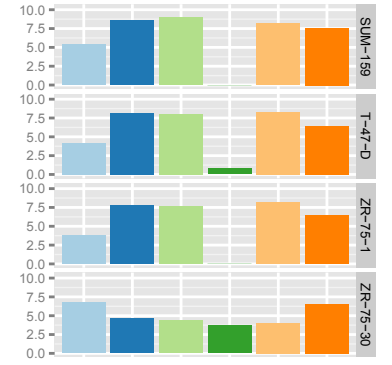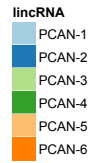

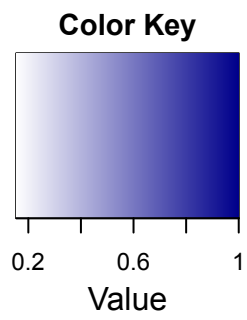

# LincRNA expression correlation

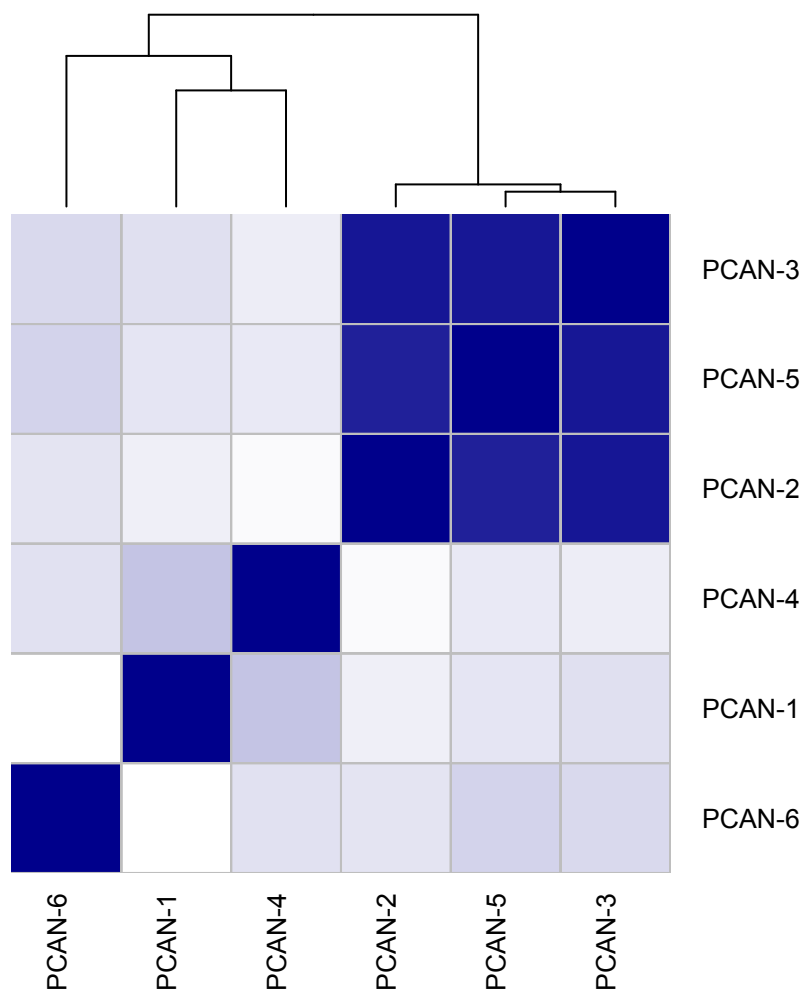

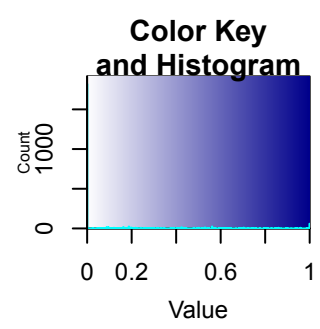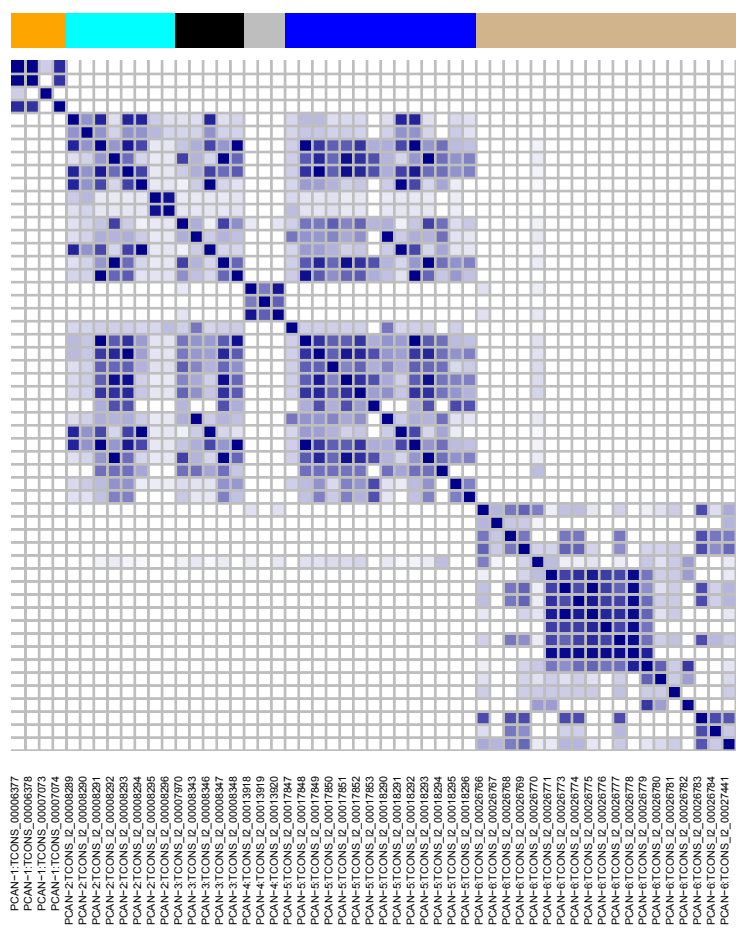

PCAN-1.TCONS\_00006377  
PCAN-1.TCONS\_00006378  
PCAN-1.TCONS\_00007073  
PCAN-1.TCONS\_00007074  
PCAN-2.TCONS\_00008289  
PCAN-2.TCONS\_00008290  
PCAN-2.TCONS\_00008291  
PCAN-2.TCONS\_00008292  
PCAN-2.TCONS\_00008293  
PCAN-2.TCONS\_00008294  
PCAN-2.TCONS\_00008295  
PCAN-2.TCONS\_00008296  
PCAN-3.TCONS\_00007970  
PCAN-3.TCONS\_00008343  
PCAN-3.TCONS\_00008346  
PCAN-3.TCONS\_00008347  
PCAN-3.TCONS\_00008348  
PCAN-4.TCONS\_00013918  
PCAN-4.TCONS\_00013919  
PCAN-4.TCONS\_00013920  
PCAN-5.TCONS\_00017847  
PCAN-5.TCONS\_00017848  
PCAN-5.TCONS\_00017849  
PCAN-5.TCONS\_00017850  
PCAN-5.TCONS\_00017851  
PCAN-5.TCONS\_00017852  
PCAN-5.TCONS\_00017853  
PCAN-5.TCONS\_00018290  
PCAN-5.TCONS\_00018291  
PCAN-5.TCONS\_00018292  
PCAN-5.TCONS\_00018293  
PCAN-5.TCONS\_00018294  
PCAN-5.TCONS\_00018295  
PCAN-5.TCONS\_00018296  
PCAN-6.TCONS\_00026766  
PCAN-6.TCONS\_00026767  
PCAN-6.TCONS\_00026768  
PCAN-6.TCONS\_00026769  
PCAN-6.TCONS\_00026770  
PCAN-6.TCONS\_00026771  
PCAN-6.TCONS\_00026773  
PCAN-6.TCONS\_00026774  
PCAN-6.TCONS\_00026775  
PCAN-6.TCONS\_00026776  
PCAN-6.TCONS\_00026777  
PCAN-6.TCONS\_00026778  
PCAN-6.TCONS\_00026779  
PCAN-6.TCONS\_00026780  
PCAN-6.TCONS\_00026781  
PCAN-6.TCONS\_00026782  
PCAN-6.TCONS\_00026783  
PCAN-6.TCONS\_00026784  
PCAN-6.TCONS\_00027441

PCAN-1.TCONS\_00006377  
PCAN-1.TCONS\_00006378  
PCAN-1.TCONS\_00007073  
PCAN-1.TCONS\_00007074  
PCAN-2.TCONS\_00008289  
PCAN-2.TCONS\_00008290  
PCAN-2.TCONS\_00008291  
PCAN-2.TCONS\_00008292  
PCAN-2.TCONS\_00008293  
PCAN-2.TCONS\_00008294  
PCAN-2.TCONS\_00008295  
PCAN-2.TCONS\_00008296  
PCAN-3.TCONS\_00007970  
PCAN-3.TCONS\_00008343  
PCAN-3.TCONS\_00008346  
PCAN-3.TCONS\_00008347  
PCAN-3.TCONS\_00008348  
PCAN-4.TCONS\_00013918  
PCAN-4.TCONS\_00013919  
PCAN-4.TCONS\_00013920  
PCAN-5.TCONS\_00017847  
PCAN-5.TCONS\_00017848  
PCAN-5.TCONS\_00017849  
PCAN-5.TCONS\_00017850  
PCAN-5.TCONS\_00017851  
PCAN-5.TCONS\_00017852  
PCAN-5.TCONS\_00017853  
PCAN-5.TCONS\_00018290  
PCAN-5.TCONS\_00018291  
PCAN-5.TCONS\_00018292  
PCAN-5.TCONS\_00018293  
PCAN-5.TCONS\_00018294  
PCAN-5.TCONS\_00018295  
PCAN-5.TCONS\_00018296  
PCAN-6.TCONS\_00026766  
PCAN-6.TCONS\_00026767  
PCAN-6.TCONS\_00026768  
PCAN-6.TCONS\_00026769  
PCAN-6.TCONS\_00026770  
PCAN-6.TCONS\_00026771  
PCAN-6.TCONS\_00026773  
PCAN-6.TCONS\_00026774  
PCAN-6.TCONS\_00026775  
PCAN-6.TCONS\_00026776  
PCAN-6.TCONS\_00026777  
PCAN-6.TCONS\_00026778  
PCAN-6.TCONS\_00026779  
PCAN-6.TCONS\_00026780  
PCAN-6.TCONS\_00026781  
PCAN-6.TCONS\_00026782  
PCAN-6.TCONS\_00026783  
PCAN-6.TCONS\_00026784  
PCAN-6.TCONS\_00027441

### ROC TCGA training data

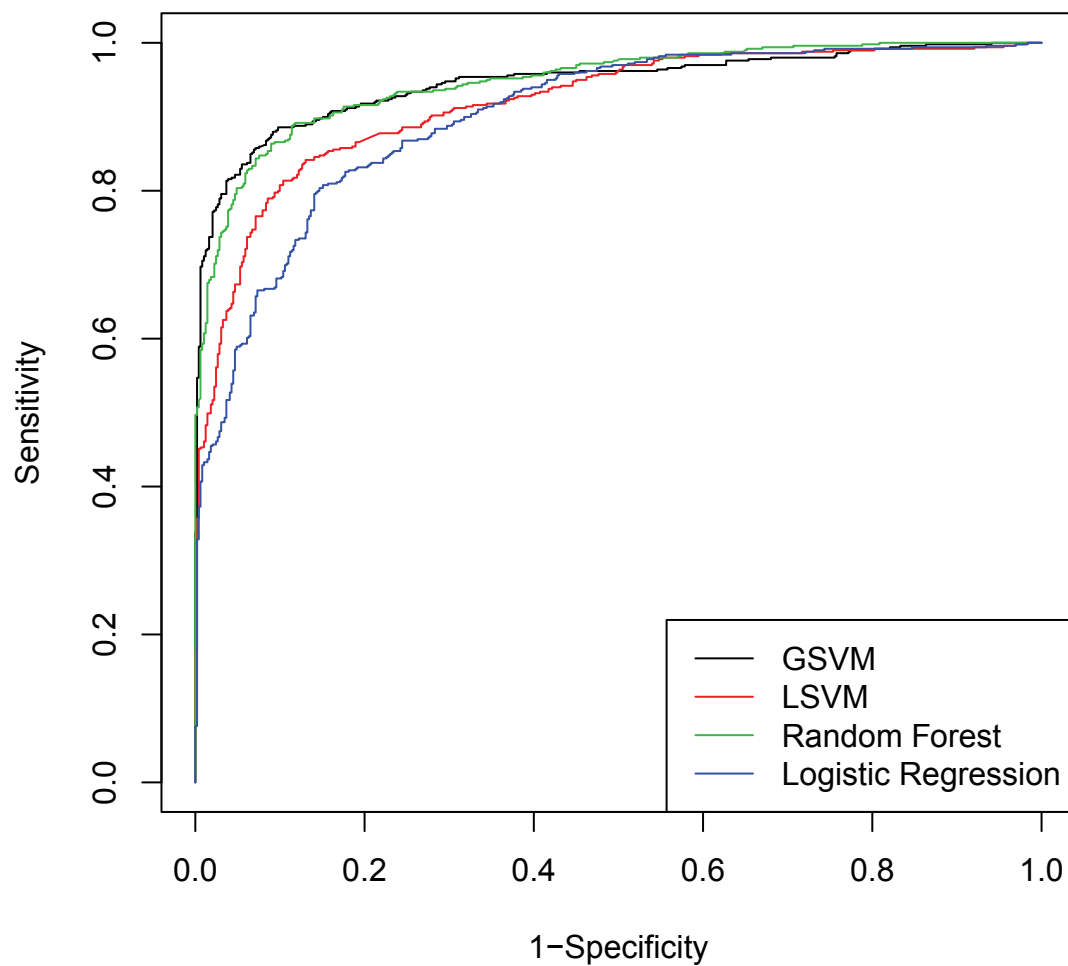

A

BRCA overall survival lincRNA model  $p = 0.01248$ 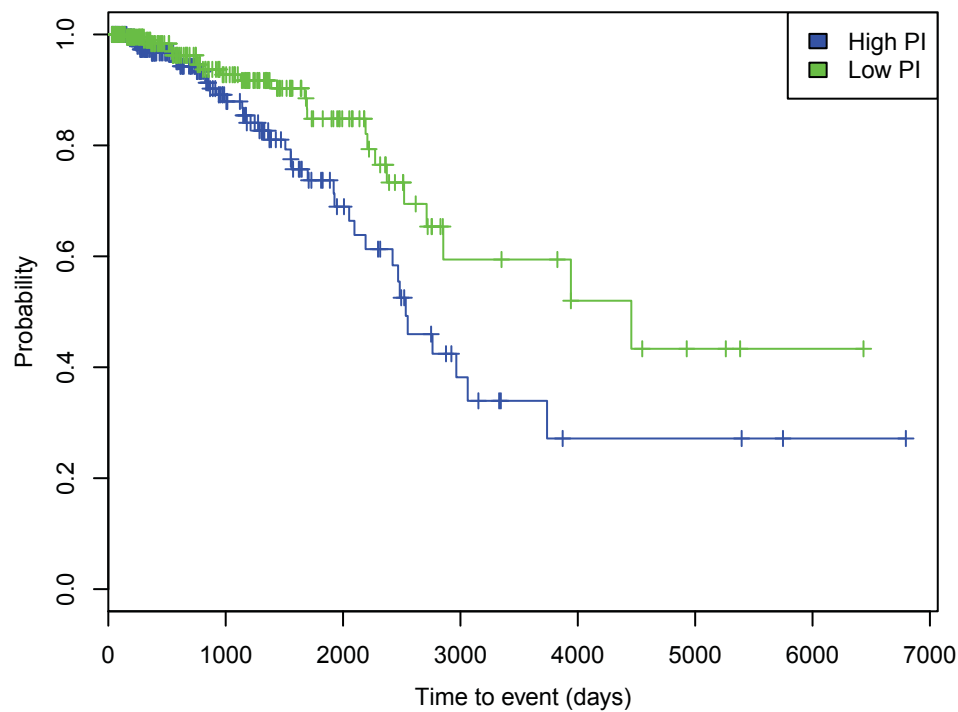

B

OV overall survival (Stage 3) lincRNA model  $p = 0.01012$ 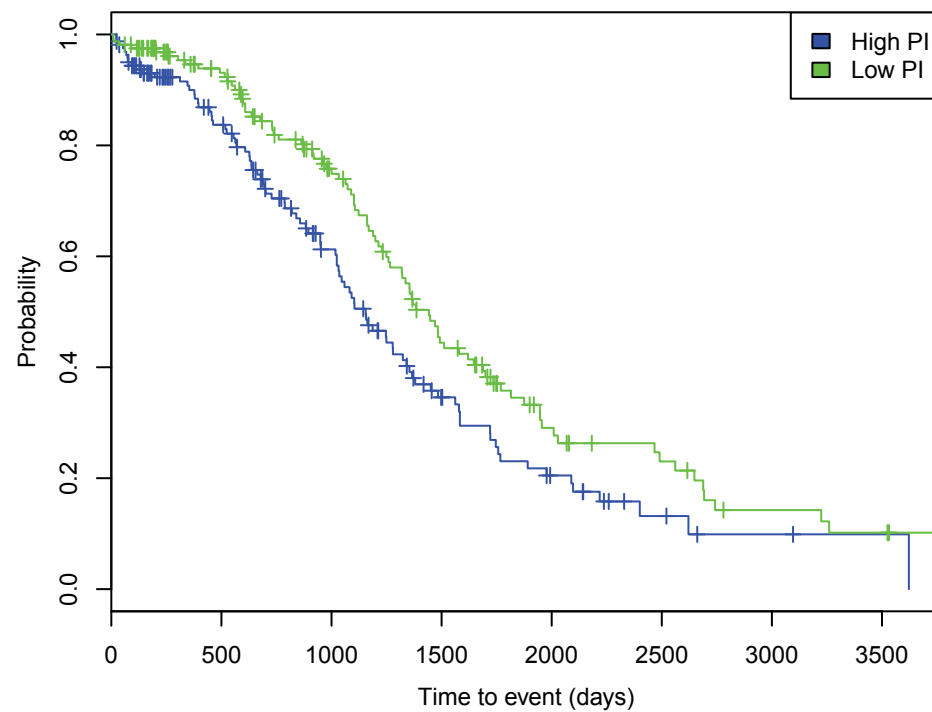

C

LUAD relapse free survival lincRNA model  $p = 0.04159$ 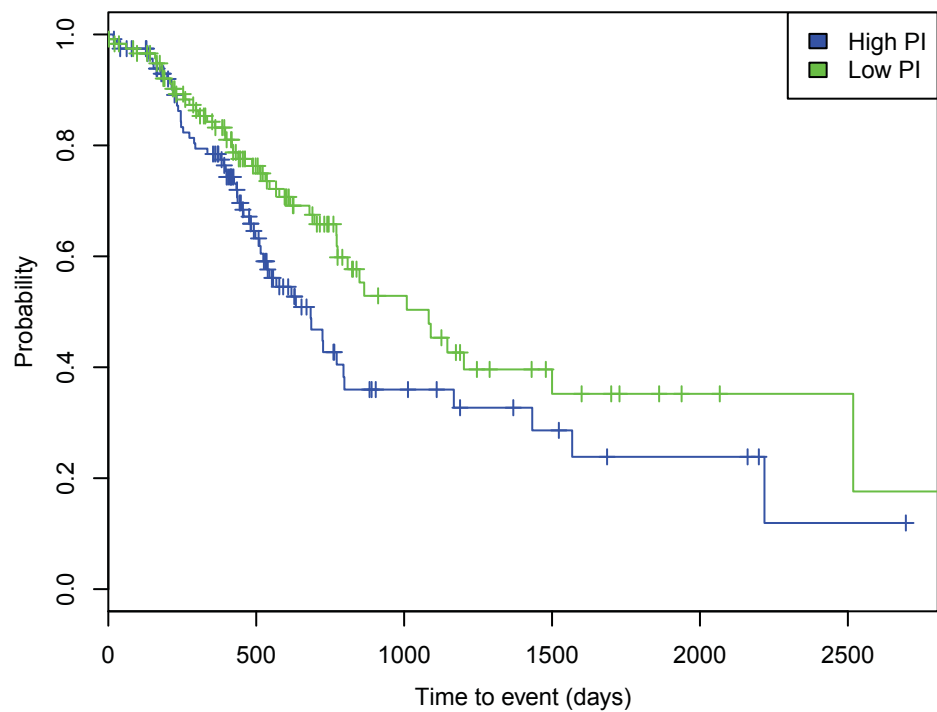

D

LUSC relapse free survival lincRNA model  $p = 0.01348$ 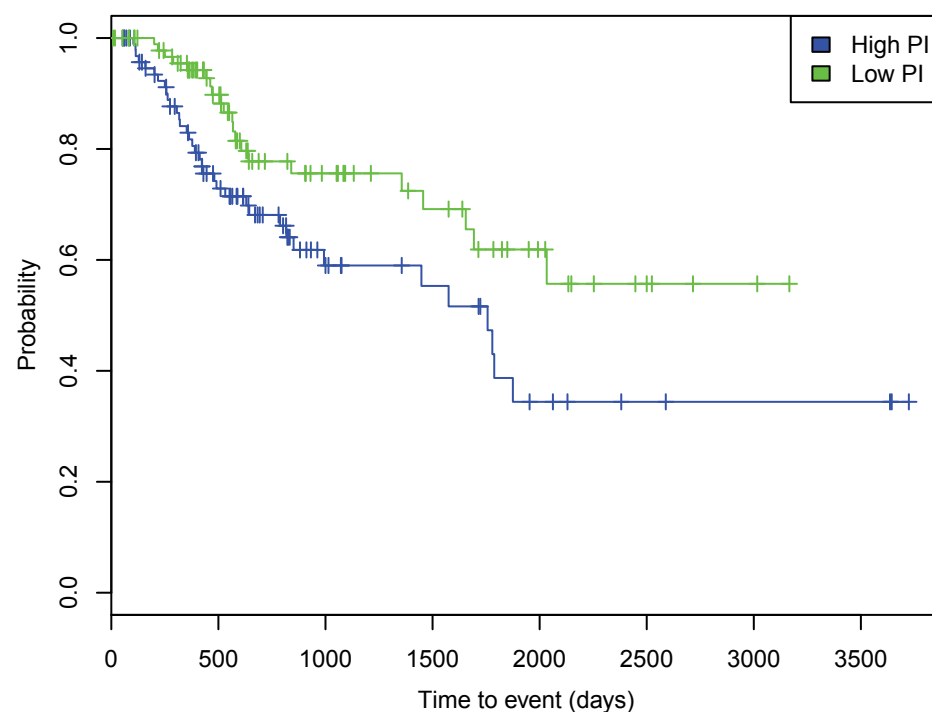

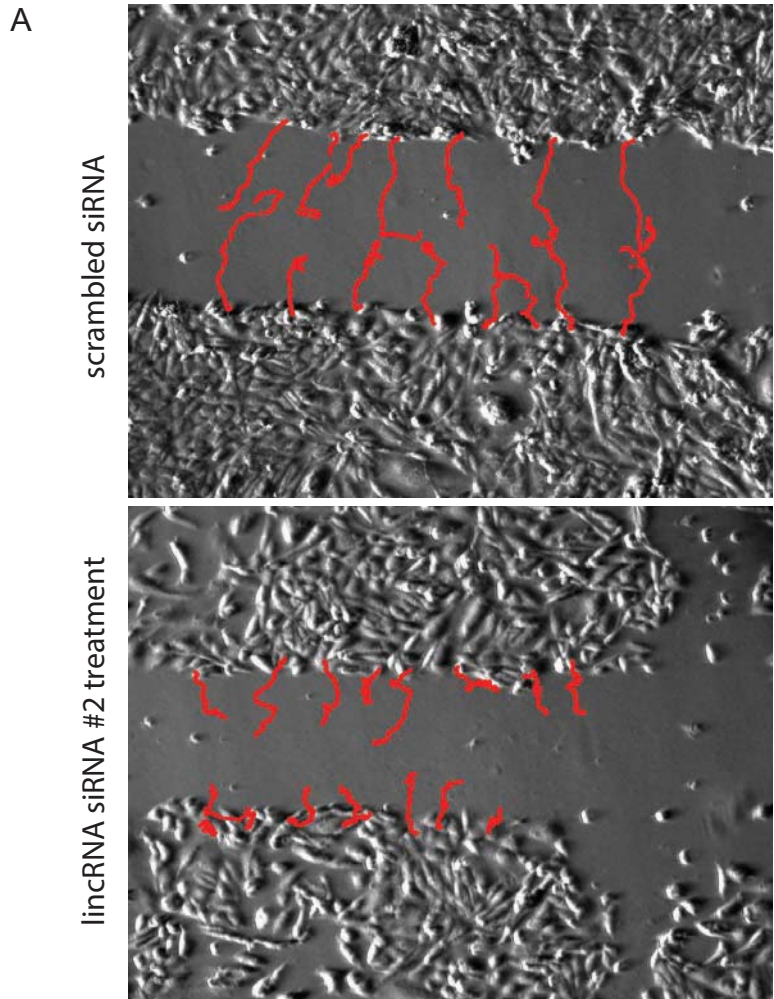

B

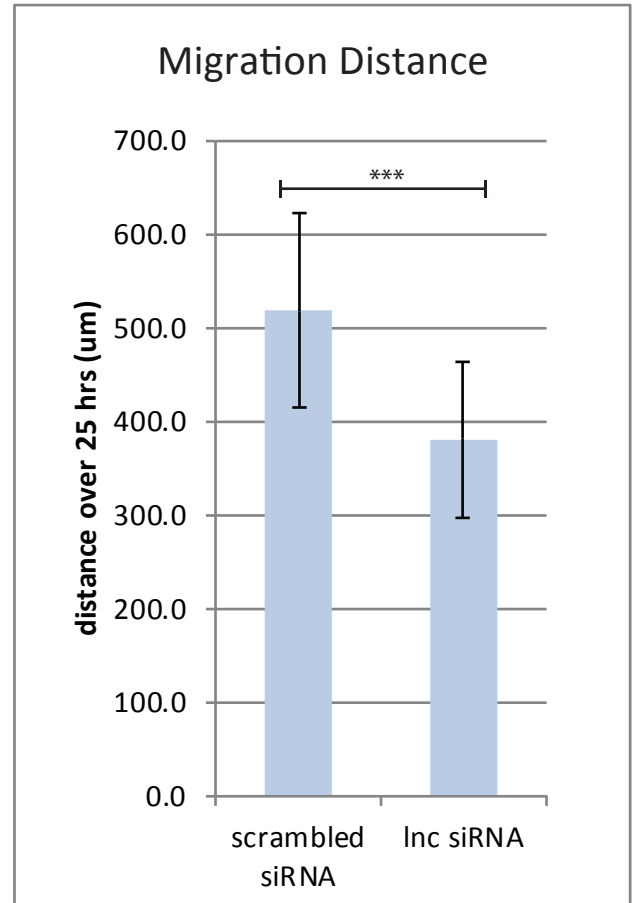

A

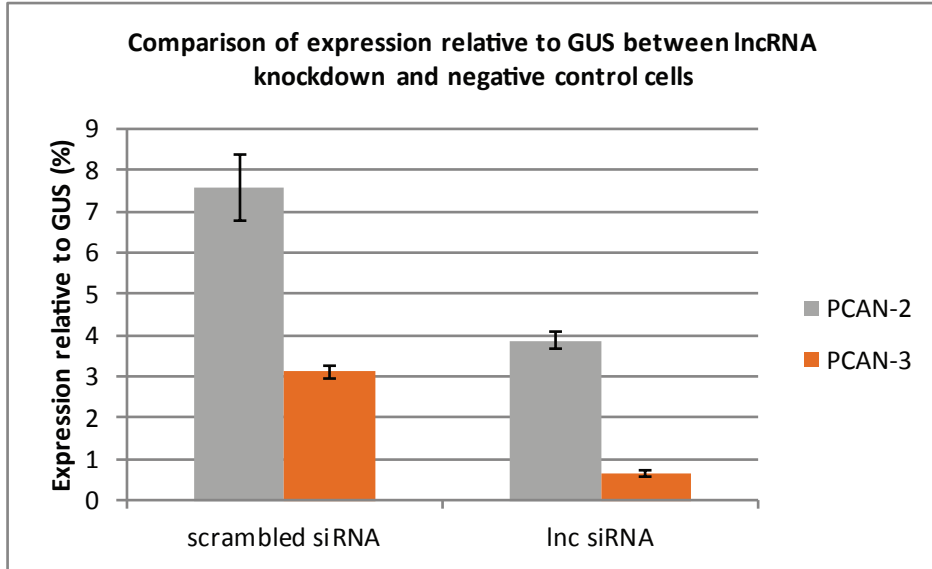

B

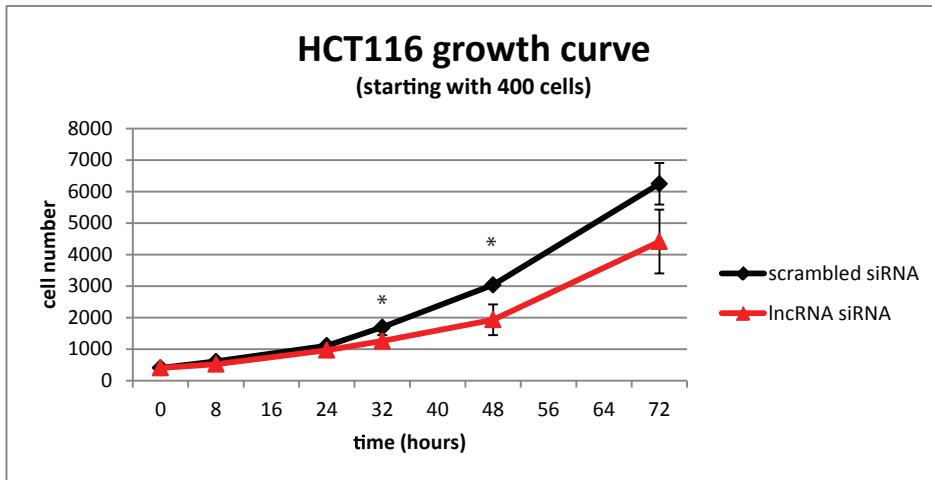

C

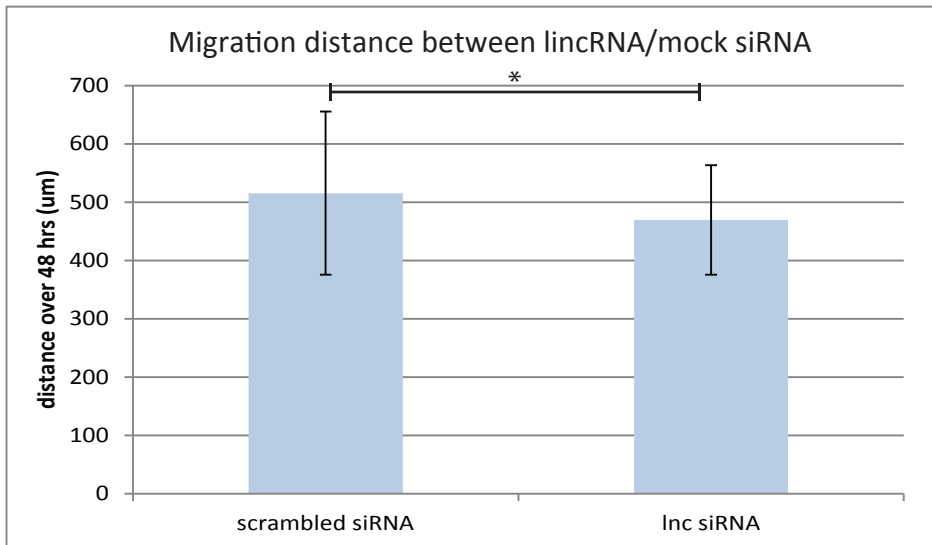

Table S1: Tabulation of samples used in study

| TCGA datasets                                      |                 |                       |                                                                        |                  |
|----------------------------------------------------|-----------------|-----------------------|------------------------------------------------------------------------|------------------|
| Dataset                                            | Primary         | Adjacent              | Paired                                                                 | # mapped reads   |
| Breast invasive carcinoma                          | 1059            | 111                   | 111                                                                    | 193560468        |
| Colon adenocarcinoma                               | 444             | 41                    | 41                                                                     | 44872617         |
| Head and Neck squamous cell carcinoma              | 498             | 43                    | 41                                                                     | 57516555         |
| Kidney Chromophobe                                 | 66              | 25                    | 25                                                                     | 42982445         |
| Kidney renal clear cell carcinoma                  | 531             | 72                    | 72                                                                     | 94701140         |
| Kidney renal papillary cell carcinoma              | 226             | 32                    | 32                                                                     | 48960010         |
| Liver hepatocellular carcinoma                     | 210             | 50                    | 50                                                                     | 46819687         |
| Lung adenocarcinoma                                | 489             | 58                    | 57                                                                     | 69621821         |
| Lung squamous cell carcinoma                       | 489             | 50                    | 50                                                                     | 86702630         |
| Prostate adenocarcinoma                            | 419             | 52                    | 52                                                                     | 98002347         |
| Stomach adenocarcinoma                             | 285             | 32                    | 30                                                                     | 65146435         |
| Thyroid carcinoma                                  | 498             | 59                    | 59                                                                     | 127022122        |
| <b>Subtotal</b>                                    | <b>5214</b>     | <b>625</b>            | <b>620</b>                                                             | <b>975908277</b> |
| <b>Samples used for survival analysis</b>          |                 |                       |                                                                        |                  |
| <b>Cancer</b>                                      |                 |                       |                                                                        |                  |
| Breast invasive carcinoma                          | 463             |                       |                                                                        |                  |
| Ovarian serous adenocarcinoma                      | 406             |                       |                                                                        |                  |
| Lung adenocarcinoma                                | 193             |                       |                                                                        |                  |
| Lung squamous cell carcinoma                       | 139             |                       |                                                                        |                  |
| <b>Samples used for subtype analysis</b>           |                 |                       |                                                                        |                  |
| <b>Cancer</b>                                      |                 |                       |                                                                        |                  |
| Breast invasive carcinoma                          | 521             |                       |                                                                        |                  |
| <b>Validation Datasets</b>                         |                 |                       |                                                                        |                  |
| <b>Accssion</b>                                    | <b>Cancer</b>   | <b>Non-cancer</b>     | <b>Additional Details</b>                                              |                  |
| GSE25599                                           | 10              | 10                    | Single end, 36 bp, Liver Cancer (HBV)                                  |                  |
| GSE58135                                           | 84              | 56                    | Paired, 100 bp, Breast Cancer                                          |                  |
| GSE50760                                           | 36              | 36                    | Paired, 100 bp, Colon cancer                                           |                  |
| Our BRCA dataset                                   | 10              | 6                     | Single end, 100 bp, BRCA; normal samples: GSE52194, GSE45326, GSE30611 |                  |
| <b>Whole Human Genome Oligo Microarray G4112A</b>  |                 |                       |                                                                        |                  |
| GSE12428                                           | Cancer<br>34    | Non-cancer<br>28      | <b>Additional Details</b><br>Microarray, lung squamous cell carcinoma  |                  |
| <b>Affymetrix Human Exon 1.0 ST Array</b>          |                 |                       |                                                                        |                  |
| GSE30727                                           | Cancer<br>30    | Non-cancer<br>30      | <b>Additional Details</b><br>Microarray, stomach cancer                |                  |
| GSE47032                                           | 20              | 20                    | Microarray, kidney clear cell cancer                                   |                  |
| GSE23397                                           | 15              | 6                     | Microarray, pancreatic cancer                                          |                  |
| GSE21034                                           | 150             | 29                    | Microarray, prostate cancer                                            |                  |
| GSE13195                                           | 25              | 25                    | Microarray, stomach cancer                                             |                  |
| GSE12236                                           | 16              | 24                    | Microarray, lung cancer                                                |                  |
| GSE29156                                           | 9               | 11                    | Microarray, ovarian cancer                                             |                  |
| <b>Affymetrix Human Genome U133 Plus 2.0 Array</b> |                 |                       |                                                                        |                  |
| GSE3467                                            | Cancer<br>9     | Non-cancer<br>9       | <b>Additional Details</b><br>Microarray, thyroid samples               |                  |
| GSE31056                                           | 23              | 72                    | Microarray, oral carcinoma                                             |                  |
| <b>SurePrint G3 Human GE 8x60K Microarray</b>      |                 |                       |                                                                        |                  |
| GSE33447                                           | Cancer<br>8     | Non-cancer<br>8       | <b>Additional Details</b><br>Microarray, breast cancer samples         |                  |
| <b>GSE58135 subtype analysis</b>                   |                 |                       |                                                                        |                  |
|                                                    | ER+/HER2-<br>42 | Triple Negative<br>42 |                                                                        |                  |
| <b>Total unique biological samples</b>             |                 |                       |                                                                        |                  |
|                                                    | <b>3354</b>     |                       |                                                                        |                  |



Table S2

| <u>lincRNA</u> | <u>JS Score</u> | <u>Associated Tissue</u> |
|----------------|-----------------|--------------------------|
| XLOC_010690    | 0.766204217     | kidney                   |
| XLOC_007596    | 0.857703592     | liver                    |
| XLOC_003732    | 0.752100476     | colon                    |
| XLOC_010399    | 0.768482652     | kidney                   |
| XLOC_008645    | 0.758646776     | lung                     |
| XLOC_011257    | 0.763064551     | liver                    |
| XLOC_001387    | 0.77810803      | liver                    |
| XLOC_007597    | 0.824089647     | liver                    |
| XLOC_000947    | 0.903394197     | adipose+breast           |
| XLOC_011275    | 0.911613639     | liver                    |
| XLOC_004719    | 0.941948946     | kidney                   |
| XLOC_013795    | 0.781746482     | adipose+breast           |
| XLOC_004102    | 0.873732325     | kidney                   |
| XLOC_004360    | 0.785572253     | adipose+breast           |
| XLOC_003239    | 0.775039257     | lung                     |
| XLOC_008455    | 0.770565259     | adipose+breast           |
| XLOC_004177    | 1               | lung                     |
| XLOC_001901    | 0.760514635     | liver                    |
| XLOC_004836    | 0.754396243     | adipose+breast           |
| XLOC_004514    | 0.794355439     | liver                    |
| XLOC_004801    | 0.906048522     | adipose+breast           |
| XLOC_004261    | 0.817042521     | adipose+breast           |
| XLOC_000224    | 0.799618236     | kidney                   |
| XLOC_004269    | 0.867461193     | kidney                   |
| XLOC_008454    | 0.792515074     | adipose+breast           |
| XLOC_004515    | 0.752963989     | liver                    |
| XLOC_005515    | 0.767317503     | thyroid                  |
| XLOC_008260    | 0.902906732     | lung                     |
| XLOC_001704    | 0.848966352     | liver                    |
| XLOC_013779    | 0.756769238     | head+neck                |
| XLOC_007883    | 0.926395141     | liver                    |
| XLOC_006805    | 0.772086177     | kidney                   |
| XLOC_008446    | 1               | kidney                   |
| XLOC_003315    | 0.791869141     | colon                    |
| XLOC_012693    | 0.755588854     | liver                    |
| XLOC_000857    | 0.760980892     | kidney                   |
| XLOC_009690    | 0.763803004     | lung                     |
| XLOC_001425    | 0.900101922     | kidney                   |
| XLOC_005607    | 0.808412113     | liver                    |
| XLOC_010419    | 0.779716586     | thyroid                  |
| XLOC_013465    | 0.754345459     | prostate                 |
| XLOC_007017    | 0.773648455     | adipose+breast           |
| XLOC_008602    | 0.767872806     | liver                    |
| XLOC_007405    | 0.804291982     | prostate                 |
| XLOC_014355    | 0.762921632     | prostate                 |
| XLOC_013037    | 0.768622905     | prostate                 |
| XLOC_001378    | 0.862077396     | kidney                   |
| XLOC_005775    | 0.817266832     | kidney                   |
| XLOC_000430    | 0.936023257     | liver                    |
| XLOC_I2_000357 | 0.767464299     | lung                     |
| XLOC_I2_013883 | 0.914582666     | prostate                 |
| XLOC_I2_001548 | 0.763547727     | adipose+breast           |
| XLOC_I2_004342 | 0.768931463     | prostate                 |

Table S3

| lincRNA | Human Body Map ID | Chromosome | lincRNA strand | lincRNA start | lincRNA width | lincRNA end | Closest Gene | Distance | Gene start | Gene width | Gene end  | Ensembl Annotation                         | Ensembl gene match |
|---------|-------------------|------------|----------------|---------------|---------------|-------------|--------------|----------|------------|------------|-----------|--------------------------------------------|--------------------|
| PCAN-1  | XLOC_002996       | chr3       | +              | 195367106     | 10516         | 195377622   | APOD         | 56029    | 195295573  | 15504      | 195311077 | LincRNA, Unannotated                       | N/A                |
| PCAN-2  | XLOC_I2_004121    | chr14      | +              | 19650018      | 45163         | 19695181    | POTEG        | 65075    | 19553365   | 31578      | 19584943  | LincRNA, Unannotated                       | AL589743.1         |
| PCAN-3  | XLOC_I2_004340    | chr14      | -              | 19856361      | 68973         | 19925334    | POTEM        | 58620    | 19983954   | 36319      | 20020273  | LincRNA, Unannotated                       | CTD-2314B22.3      |
| PCAN-4  | XLOC_I2_007509    | chr2       | +              | 114298969     | 29137         | 114328106   | FOXD4L1      | 40241    | 114256661  | 2067       | 114258728 | Processed Pseudogene, Unannotated          | N/A                |
| PCAN-5  | XLOC_I2_009441    | chr22      | -              | 16101370      | 91857         | 16193227    | POTEH        | 63105    | 16256332   | 31606      | 16287938  | LincRNA, Processed Transcript, Unannotated | AP000525.9         |
| PCAN-6  | XLOC_I2_013931    | chr7       | -              | 97503667      | 98000         | 97601667    | ASNS         | 1812     | 97481429   | 20426      | 97501855  | Processed Pseudogene, Unannotated          | N/A                |

\*Ensembl v75 (GRCh37), annotated exons

Table S4

| Assay Label | LincRNA target          | Primers                                                          |
|-------------|-------------------------|------------------------------------------------------------------|
| 4121_1:     | PCAN-2 (XLOC_I2_004121) | F: 5'-AGCTTCGGAGAAGCAGTGGT-3'<br>R: 5'-TTCTTTCCGCGGAGACCT-3'     |
| 4340_4      | PCAN-3 (XLOC_I2_004340) | F: 5'-ACAGATGAACCGCGGAGAC-3'<br>R: 5'-AGCTTCGGAGAAGCAGTGGT-3'    |
| 2996_3      | PCAN-1 (XLOC_I2_002996) | F: 5'-TAAGGGTCATGGAGCTGGAG-3'<br>R: 5'-ATCAGCTCCTCCCCGAGTAT-3'   |
| 7509_4      | PCAN-4 (XLOC_I2_007509) | F: 5'-GAAGTTTAATGTTGCCAATGGA-3'<br>R: 5'-GCCTTTGCACAGACTGACCT-3' |
| 13931_6     | PCAN-6 (XLOC_I2_013931) | F: 5'-ATCCAGAAGTGCAGCCAGTC-3'<br>R: 5'-AGAAGTACATGGGGGTGTGG-3'   |

Supplemental Table V part 1

[http://lilab.research.bcm.edu/cpat/calculator\\_sub.php](http://lilab.research.bcm.edu/cpat/calculator_sub.php)

Reference: CPAT: Coding-Potential Assessment Tool using an alignment-free logistic regression model. Nucleic Acid Research

**PCAN-1 (XLOC\_002996)**

| Sequence Name  | RNA Size | ORF Size | Ficket Score | Hexamer Score | Coding Probability | Coding Label    |
|----------------|----------|----------|--------------|---------------|--------------------|-----------------|
| TCONS_00006377 |          | 6659     | 633          | 0.5291        | 0.173947044        | 0.760142576 yes |
| TCONS_00006378 |          | 1716     | 135          | 1.0111        | 0.171563902        | 0.080769211 no  |
| TCONS_00007073 |          | 211      | 96           | 0.6124        | -0.376596856       | 0.000483433 no  |
| TCONS_00007074 |          | 1586     | 153          | 1.1382        | 0.213026381        | 0.17417223 no   |

**PCAN-2 (XLOC\_I2\_004121)**

| Sequence Name     | RNA Size | ORF Size | Ficket Score | Hexamer Score | Coding Probability | Coding Label   |
|-------------------|----------|----------|--------------|---------------|--------------------|----------------|
| TCONS_L2_00008289 |          | 768      | 117          | 0.7464        | 0.041918727        | 0.013971842 no |
| TCONS_L2_00008290 |          | 549      | 192          | 0.8298        | 0.048534387        | 0.042017289 no |
| TCONS_L2_00008291 |          | 2102     | 276          | 0.484         | -0.012649119       | 0.021810528 no |
| TCONS_L2_00008292 |          | 1406     | 327          | 0.639         | -0.180683866       | 0.021204847 no |
| TCONS_L2_00008293 |          | 2391     | 267          | 0.42          | -0.077650944       | 0.010473072 no |
| TCONS_L2_00008294 |          | 4116     | 267          | 0.42          | -0.077650944       | 0.009441453 no |
| TCONS_L2_00008295 |          | 1060     | 342          | 0.5027        | -0.119244657       | 0.02480705 no  |
| TCONS_L2_00008296 |          | 990      | 342          | 0.5027        | -0.119244657       | 0.024910079 no |

**PCAN-3 (XLOC\_I2\_004340)**

| Sequence Name     | RNA Size | ORF Size | Ficket Score | Hexamer Score | Coding Probability | Coding Label   |
|-------------------|----------|----------|--------------|---------------|--------------------|----------------|
| TCONS_L2_00007970 |          | 5950     | 459          | 0.6599        | 0.112352222        | 0.336164826 no |
| TCONS_L2_00008343 |          | 1169     | 144          | 0.6051        | -0.107657632       | 0.004404995 no |
| TCONS_L2_00008346 |          | 4142     | 267          | 0.42          | -0.077650944       | 0.009426701 no |
| TCONS_L2_00008347 |          | 1405     | 327          | 0.639         | -0.180683866       | 0.021206108 no |
| TCONS_L2_00008348 |          | 570      | 168          | 0.904         | -0.068320034       | 0.019342915 no |

**PCAN-4 (XLOC\_I2\_007509)**

| Sequence Name     | RNA Size | ORF Size | Ficket Score | Hexamer Score | Coding Probability | Coding Label   |
|-------------------|----------|----------|--------------|---------------|--------------------|----------------|
| TCONS_L2_00013918 |          | 2879     | 270          | 0.6819        | -0.343879747       | 0.004149952 no |
| TCONS_L2_00013919 |          | 547      | 192          | 1.0539        | 0.129150962        | 0.131216094 no |
| TCONS_L2_00013920 |          | 2179     | 270          | 0.6819        | -0.343879747       | 0.00432936 no  |

**PCAN-5 (XLOC\_I2\_009441)**

| Sequence Name     | RNA Size | ORF Size | Ficket Score | Hexamer Score | Coding Probability | Coding Label   |
|-------------------|----------|----------|--------------|---------------|--------------------|----------------|
| TCONS_L2_00017847 |          | 609      | 150          | 0.8864        | -0.136597695       | 0.009670352 no |
| TCONS_L2_00017848 |          | 880      | 168          | 0.868         | -0.07522081        | 0.016248197 no |
| TCONS_L2_00017849 |          | 913      | 168          | 0.868         | -0.07522081        | 0.016216201 no |
| TCONS_L2_00017850 |          | 763      | 168          | 0.868         | -0.07522081        | 0.016362141 no |
| TCONS_L2_00017851 |          | 757      | 144          | 0.6203        | -0.079415711       | 0.005701195 no |
| TCONS_L2_00017852 |          | 631      | 168          | 0.868         | -0.07522081        | 0.016491637 no |
| TCONS_L2_00017853 |          | 359      | 93           | 0.9437        | -0.087655495       | 0.008776281 no |
| TCONS_L2_00018290 |          | 1174     | 144          | 0.6051        | -0.107657632       | 0.004403664 no |
| TCONS_L2_00018291 |          | 4136     | 267          | 0.42          | -0.077650944       | 0.009430103 no |
| TCONS_L2_00018292 |          | 2102     | 276          | 0.484         | -0.012649119       | 0.021810528 no |
| TCONS_L2_00018293 |          | 1394     | 327          | 0.6533        | -0.197474682       | 0.019892986 no |
| TCONS_L2_00018294 |          | 413      | 144          | 0.6051        | -0.107657632       | 0.004610957 no |
| TCONS_L2_00018295 |          | 871      | 102          | 0.8213        | -0.089455015       | 0.006323578 no |
| TCONS_L2_00018296 |          | 551      | 258          | 0.6655        | 0.081717204        | 0.062360503 no |

**PCAN-6 (XLOC\_I2\_013931)**

| Sequence Name     | RNA Size | ORF Size | Ficket Score | Hexamer Score | Coding Probability | Coding Label    |
|-------------------|----------|----------|--------------|---------------|--------------------|-----------------|
| TCONS_L2_00026766 |          | 1676     | 459          | 0.484         | 0.100992688        | 0.259495691 no  |
| TCONS_L2_00026767 |          | 809      | 591          | 0.702         | 0.137974424        | 0.795810077 yes |
| TCONS_L2_00026768 |          | 376      | 252          | 1.047         | 0.176429194        | 0.280760562 no  |
| TCONS_L2_00026769 |          | 453      | 153          | 1.0189        | 0.316429065        | 0.23511127 no   |
| TCONS_L2_00026770 |          | 4110     | 396          | 0.618         | -0.361689179       | 0.010864527 no  |
| TCONS_L2_00026771 |          | 1215     | 267          | 1.1441        | 0.363689952        | 0.67084369 yes  |
| TCONS_L2_00026773 |          | 1150     | 267          | 1.1441        | 0.363689952        | 0.671714583 yes |
| TCONS_L2_00026774 |          | 1091     | 267          | 1.1441        | 0.363689952        | 0.672504065 yes |
| TCONS_L2_00026775 |          | 829      | 267          | 1.1441        | 0.363689952        | 0.675998075 yes |
| TCONS_L2_00026776 |          | 930      | 327          | 1.2265        | 0.349269552        | 0.823711195 yes |
| TCONS_L2_00026777 |          | 1119     | 267          | 1.1441        | 0.363689952        | 0.672129517 yes |
| TCONS_L2_00026778 |          | 582      | 267          | 1.1441        | 0.363689952        | 0.679274184 yes |
| TCONS_L2_00026779 |          | 1167     | 267          | 1.1441        | 0.363689952        | 0.671486925 yes |
| TCONS_L2_00026780 |          | 659      | 135          | 0.3685        | -0.40494765        | 0.00027646 no   |
| TCONS_L2_00026781 |          | 400      | 156          | 0.6087        | -0.431469675       | 0.000628962 no  |
| TCONS_L2_00026782 |          | 255      | 246          | 0.4729        | -0.16219555        | 0.006446424 no  |
| TCONS_L2_00026783 |          | 287      | 204          | 0.9136        | 0.316628344        | 0.279341985 no  |
| TCONS_L2_00026784 |          | 1549     | 210          | 1.0844        | 0.305066245        | 0.377734015 yes |
| TCONS_L2_00027441 |          | 929      | 426          | 0.4914        | 0.202855179        | 0.339790484 no  |

**Protein coding gene controls**

**GAPDH**

| Sequence Name     | RNA Size | ORF Size | Ficket Score | Hexamer Score | Coding Probability | Coding Label    |
|-------------------|----------|----------|--------------|---------------|--------------------|-----------------|
| ENST00000229239.5 |          | 1875     | 1008         | 1.2926        | 0.519960341        | 0.999962146 yes |
| ENST00000396861.1 |          | 1348     | 1008         | 1.2926        | 0.519960341        | 0.999963338 yes |
| ENST00000396858.1 |          | 1292     | 882          | 1.2952        | 0.533919114        | 0.999870952 yes |
| ENST00000396859.1 |          | 1256     | 1008         | 1.2926        | 0.519960341        | 0.999963542 yes |
| ENST00000396856.1 |          | 1266     | 783          | 1.315         | 0.548545855        | 0.999679465 yes |

**GUSB**

| Sequence Name     | RNA Size | ORF Size | Ficket Score | Hexamer Score | Coding Probability | Coding Label    |
|-------------------|----------|----------|--------------|---------------|--------------------|-----------------|
| ENST00000304895.4 |          | 2300     | 339          | 1.2668        | 0.277977644        | 0.776289336 yes |
| ENST00000421103.1 |          | 1742     | 339          | 1.2668        | 0.277977644        | 0.782118123 yes |
| ENST00000345660.6 |          | 2027     | 285          | 1.1446        | 0.333726267        | 0.659495687 yes |

Supplemental Table V part 2  
 Results from iSeeRNA: <http://137.189.133.71/iSeeRNA/>  
**PCNA-1 (XLOC\_002996)**

| ID             | C/NC      | NONCODING SCORE |
|----------------|-----------|-----------------|
| TCONS_00007074 | noncoding | 0.9837          |
| TCONS_00007073 | noncoding | 0.996           |
| TCONS_00006377 | noncoding | 0.9873          |
| TCONS_00006378 | noncoding | 0.9828          |

**PCAN-2 (XLOC\_I2\_004121)**

| ID                | C/NC      | NONCODING SCORE |
|-------------------|-----------|-----------------|
| TCONS_I2_00008295 | noncoding | 0.8142          |
| TCONS_I2_00008296 | noncoding | 0.7723          |
| TCONS_I2_00008290 | noncoding | 0.9384          |
| TCONS_I2_00008289 | noncoding | 0.9267          |
| TCONS_I2_00008292 | noncoding | 0.9812          |
| TCONS_I2_00008294 | noncoding | 0.9769          |
| TCONS_I2_00008291 | noncoding | 0.9582          |
| TCONS_I2_00008293 | noncoding | 0.9681          |

**PCAN-3 (XLOC\_I2\_004340)**

| ID                | C/NC      | NONCODING SCORE |
|-------------------|-----------|-----------------|
| TCONS_I2_00008348 | noncoding | 0.9764          |
| TCONS_I2_00008347 | noncoding | 0.9819          |
| TCONS_I2_00008343 | noncoding | 0.8167          |
| TCONS_I2_00008346 | noncoding | 0.9733          |
| TCONS_I2_00007970 | noncoding | 0.9729          |

**PCAN-4 (XLOC\_I2\_007509)**

| ID                | C/NC      | NONCODING SCORE |
|-------------------|-----------|-----------------|
| TCONS_I2_00013919 | coding    | 0.208638        |
| TCONS_I2_00013920 | noncoding | 0.9405          |
| TCONS_I2_00013918 | noncoding | 0.6351          |

**PCAN-5 (XLOC\_I2\_009441)**

| ID                | C/NC      | NONCODING SCORE |
|-------------------|-----------|-----------------|
| TCONS_I2_00017847 | noncoding | 0.6722          |
| TCONS_I2_00017848 | noncoding | 0.9813          |
| TCONS_I2_00017849 | noncoding | 0.9852          |
| TCONS_I2_00017850 | noncoding | 0.9341          |
| TCONS_I2_00017851 | noncoding | 0.9674          |
| TCONS_I2_00017852 | noncoding | 0.8795          |
| TCONS_I2_00017853 | noncoding | 0.984           |
| TCONS_I2_00018290 | noncoding | 0.8125          |
| TCONS_I2_00018291 | noncoding | 0.9676          |
| TCONS_I2_00018292 | noncoding | 0.9702          |
| TCONS_I2_00018293 | noncoding | 0.9803          |
| TCONS_I2_00018294 | noncoding | 0.9135          |
| TCONS_I2_00018295 | noncoding | 0.9988          |
| TCONS_I2_00018296 | noncoding | 0.9808          |

**PCAN-6 (XLOC\_I2\_013931)**

| ID                | C/NC      | NONCODING SCORE |
|-------------------|-----------|-----------------|
| TCONS_I2_00026774 | noncoding | 0.6841          |
| TCONS_I2_00026769 | coding    | 0.0722          |
| TCONS_I2_00026766 | coding    | 0.2569          |
| TCONS_I2_00026779 | noncoding | 0.8778          |
| TCONS_I2_00026780 | noncoding | 0.8494          |
| TCONS_I2_00026781 | noncoding | 0.9237          |
| TCONS_I2_00026767 | noncoding | 0.7907          |
| TCONS_I2_00026771 | noncoding | 0.872           |
| TCONS_I2_00026778 | noncoding | 0.6522          |
| TCONS_I2_00026776 | noncoding | 0.7908          |
| TCONS_I2_00026777 | noncoding | 0.605           |
| TCONS_I2_00027441 | coding    | 0.141           |
| TCONS_I2_00026784 | noncoding | 0.8035          |
| TCONS_I2_00026768 | noncoding | 0.8508          |
| TCONS_I2_00026773 | noncoding | 0.8681          |
| TCONS_I2_00026770 | noncoding | 0.6034          |
| TCONS_I2_00026783 | noncoding | 0.7266          |
| TCONS_I2_00026782 | noncoding | 0.5388          |
| TCONS_I2_00026775 | noncoding | 0.8405          |

**Protein coding gene controls**

**GAPDH**

| ID                | C/NC   | NONCODING SCORE |
|-------------------|--------|-----------------|
| ENST00000229239.5 | coding | 0               |
| ENST00000396861.1 | coding | 0               |
| ENST00000396858.1 | coding | 0.002           |
| ENST00000396859.1 | coding | 0               |
| ENST00000396856.1 | coding | 0.0038          |

**GUSB**

| ID                | C/NC   | NONCODING SCORE |
|-------------------|--------|-----------------|
| ENST00000304895.4 | coding | 0               |
| ENST00000421103.1 | coding | 0               |
| ENST00000345660.6 | coding | 0               |

Table S6

| <b>Area under curve</b>                  |               |              |                        |                       |                       |                  |  |
|------------------------------------------|---------------|--------------|------------------------|-----------------------|-----------------------|------------------|--|
|                                          | TCGA_training | TCGA_testing | GSE58135_breast_cancer | GSE50760_colon_cancer | GSE25599_liver_cancer | Our BRCA dataset |  |
| GSVM                                     | 0.946         | 0.939        | 0.545                  | 0.827                 | 0.910                 | 0.750            |  |
| LSVM                                     | 0.918         | 0.917        | 0.968                  | 0.796                 | 0.885                 | 1.000            |  |
| Random Forest                            | 0.947         | 0.942        | 0.972                  | 0.841                 | 0.970                 | 0.950            |  |
| Logistic Regression                      | 0.901         | 0.905        | 0.646                  | 0.410                 | 0.390                 | 0.550            |  |
| <b>Max accuracy</b>                      |               |              |                        |                       |                       |                  |  |
|                                          | TCGA_training | TCGA_testing | GSE58135_breast_cancer | GSE50760_colon_cancer | GSE25599_liver_cancer | Our BRCA dataset |  |
| GSVM                                     | 0.894         | 0.903        | 0.743                  | 0.861                 | 0.850                 | 0.773            |  |
| LSVM                                     | 0.856         | 0.851        | 0.921                  | 0.833                 | 0.850                 | 1.000            |  |
| Random Forest                            | 0.887         | 0.895        | 0.936                  | 0.861                 | 0.900                 | 0.909            |  |
| Logistic Regression                      | 0.828         | 0.831        | 0.679                  | 0.639                 | 0.600                 | 0.636            |  |
| <b>F-score</b>                           |               |              |                        |                       |                       |                  |  |
|                                          | TCGA_training | TCGA_testing | GSE58135_breast_cancer | GSE50760_colon_cancer | GSE25599_liver_cancer | Our BRCA dataset |  |
| GSVM                                     | 0.788         | 0.808        | 0.489                  | 0.732                 | 0.734                 | 0.624            |  |
| LSVM                                     | 0.712         | 0.708        | 0.836                  | 0.684                 | 0.734                 | 1.000            |  |
| Random Forest                            | 0.775         | 0.790        | 0.873                  | 0.732                 | 0.816                 | 0.817            |  |
| Logistic Regression                      | 0.658         | 0.665        | 0.418                  | 0.302                 | 0.250                 | 0.346            |  |
| <b>Matthew's correlation coefficient</b> |               |              |                        |                       |                       |                  |  |
|                                          | TCGA_training | TCGA_testing | GSE58135_breast_cancer | GSE50760_colon_cancer | GSE25599_liver_cancer | Our BRCA dataset |  |
| GSVM                                     | 0.894         | 0.897        | 0.822                  | 0.848                 | 0.870                 | 0.800            |  |
| LSVM                                     | 0.855         | 0.843        | 0.936                  | 0.824                 | 0.842                 | 1.000            |  |
| Random Forest                            | 0.888         | 0.890        | 0.944                  | 0.848                 | 0.909                 | 0.900            |  |
| Logistic Regression                      | 0.826         | 0.835        | 0.750                  | 0.667                 | 0.667                 | 0.645            |  |
